# Supplementary material for: Outbreaks of Root Rot Disease in Different Aged American Ginseng Plants Are Associated With Field Microbial Dynamics
Source: Front Microbiol. 2021 Jun 25;12:676880. doi: 10.3389/fmicb.2021.676880 (PMC8267804; doi:10.3389/fmicb.2021.676880)
Supplement: Supplementary file 1 [file Data_Sheet_1.XLSX]

## Sheet: symbiotic fungi
Table S1. Potential symbiotic fungi prediction of the detected fungi based on the FUNGuild analysis. H2: soil samples obtained from 2-year-old healthy AG plants; D2: soil samples obtained from 2-year-old diseased AG plants; H3: soil samples obtained from 3-year-old healthy AG plants; D3: soil samples obtained from 3-year-old diseased AG plants; H4: soil samples obtained from 4-year-old healthy AG…
#OTU ID	taxonomy	Taxon	Trophic Mode	Guild	Confidence Ranking	Notes	Citation/Source		H2-1	H2-2	H2-3	H2-4	D2-1	D2-2	D2-3	D2-4	H3-1	H3-2	H3-3	H3-4	D3-1	D3-2	D3-3	D3-4	H4-1	H4-2	H4-3	H4-4	D4-1	D4-2	D4-3	D4-4
OTU1	k__Fungi; p__Basidiomycota; c__Agaricomycetes; o__Atheliales; f__Atheliaceae; g__Amphinema; Unclassified	Amphinema	Symbiotroph	Ectomycorrhizal	Highly Probable	NULL	Rinaldi AC, et al. 2008. Fungal Diversity 33:1-45; Tedersoo L, et al. 2010. Mycorrhiza 20:217-263; http://mycorrhizas.info/ecmf.html		640	1027	1407	976	1018	832	770	989	960	840	927	618	931	386	380	8	829	585	635	552	52	194	28	61
OTU102	k__Fungi; p__Ascomycota; c__Sordariomycetes; o__Coniochaetales; f__Coniochaetaceae; g__Lecythophora; Unclassified	Lecythophora	Symbiotroph	Endophyte	Highly Probable	Dark Septate Endophyte, known from plant roots.	Taylor DL, et al. 2014. Ecological Monographs 84:3-20		0	0	0	0	0	0	0	0	0	0	0	0	2	0	0	0	0	57	11	0	0	0	0	0
OTU1144	k__Fungi; p__Basidiomycota; c__Agaricomycetes; o__Russulales; f__Russulaceae; g__Russula; Unclassified	Russula	Symbiotroph	Ectomycorrhizal	Highly Probable	NULL	Rinaldi AC, et al. 2008. Fungal Diversity 33:1-45; Tedersoo L, et al. 2010. Mycorrhiza 20:217-263; http://mycorrhizas.info/ecmf.html		0	0	0	0	0	1	0	0	0	0	0	0	0	0	0	0	0	0	0	0	0	1	0	0
OTU129	k__Fungi; p__Basidiomycota; c__Agaricomycetes; o__Russulales; f__Russulaceae; g__Russula; s__Russula_cyanoxantha	Russula	Symbiotroph	Ectomycorrhizal	Highly Probable	NULL	Rinaldi AC, et al. 2008. Fungal Diversity 33:1-45; Tedersoo L, et al. 2010. Mycorrhiza 20:217-263; http://mycorrhizas.info/ecmf.html		0	0	0	0	0	17	0	0	7	0	0	0	0	0	2	0	0	0	22	0	0	0	1	0
OTU15	k__Fungi; p__Ascomycota; c__Pezizomycetes; o__Pezizales; f__Pyronemataceae; g__Wilcoxina; Unclassified	Wilcoxina	Symbiotroph	Ectomycorrhizal	Highly Probable	NULL	Rinaldi AC, et al. 2008. Fungal Diversity 33:1-45; Tedersoo L, et al. 2010. Mycorrhiza 20:217-263; http://mycorrhizas.info/ecmf.html		32	89	68	87	23	36	25	36	53	81	97	27	19	14	21	5	55	21	37	21	8	1	4	1
OTU182	k__Fungi; p__Basidiomycota; c__Agaricomycetes; o__Agaricales; f__Inocybaceae; g__Inocybe; s__Inocybe_asterospora	Inocybaceae	Symbiotroph	Ectomycorrhizal	Probable	Sensu stricto with the exclusion of Crepidotaceae, Tubariaceae, and Chromocyphellaceae; Pharmacology: muscarine, psilocybin, aeruginascen, unclarified alkaloids, or none	Matheny PB. 2009. McIlvainea 18:11-21		0	1	1	2	7	0	8	9	3	4	5	0	4	4	0	0	15	0	0	0	0	0	0	0
OTU184	k__Fungi; p__Basidiomycota; c__Agaricomycetes; o__Sebacinales; f__Serendipitaceae; g__Serendipita; s__Serendipita_indica	Serendipita	Symbiotroph	Orchid Mycorrhizal	Highly Probable	NULL	Tedersoo L, et al. 2010. Mycorrhiza 20:217-263 (pro parte); Weiss et al. DOI: 10.1111/nph.13977		0	0	0	0	0	0	0	0	0	13	0	6	2	4	0	15	0	0	0	0	0	0	0	0
OTU194	k__Fungi; p__Basidiomycota; c__Agaricomycetes; o__Sebacinales; f__Sebacinaceae; g__Sebacina; Unclassified	Sebacina	Symbiotroph	Ectomycorrhizal-Orchid Mycorrhizal-Root Associated Biotroph	Possible	NULL	Rinaldi AC, et al. 2008. Fungal Diversity 33:1-45; Tedersoo L, et al. 2010. Mycorrhiza 20:217-263 (pro parte); http://mycorrhizas.info/ecmf.html; Weiss et al. doi: 10.1111/nph.13977 (many guilds)		0	0	0	0	0	0	0	0	0	0	0	0	0	0	0	0	0	0	0	0	0	0	0	31
OTU195	k__Fungi; p__Basidiomycota; c__Agaricomycetes; o__Russulales; f__Russulaceae; g__Lactarius; Unclassified	Lactarius	Symbiotroph	Ectomycorrhizal	Highly Probable	Common name - milk-cap	Rinaldi AC, et al. 2008. Fungal Diversity 33:1-45; Tedersoo L, et al. 2010. Mycorrhiza 20:217-263; http://mycorrhizas.info/ecmf.html		0	0	0	0	0	0	14	0	0	0	6	12	0	0	0	0	0	0	0	0	0	0	0	0
OTU223	k__Fungi; p__Basidiomycota; c__Agaricomycetes; o__Agaricales; f__Hebelomataceae; Unclassified; Unclassified	Hebelomataceae	Symbiotroph	Ectomycorrhizal	Possible	NULL	Locquin MV. 1977. Flore Mycologique 3:146		0	5	0	2	3	1	0	0	0	0	1	0	0	0	0	0	0	0	10	0	0	2	0	0
OTU247	k__Fungi; p__Basidiomycota; c__Agaricomycetes; o__Russulales; f__Russulaceae; g__Russula; s__Russula_violeipes	Russula	Symbiotroph	Ectomycorrhizal	Highly Probable	NULL	Rinaldi AC, et al. 2008. Fungal Diversity 33:1-45; Tedersoo L, et al. 2010. Mycorrhiza 20:217-263; http://mycorrhizas.info/ecmf.html		0	0	0	0	0	0	0	0	0	0	0	0	0	0	0	0	0	0	0	0	27	8	0	0
OTU298	k__Fungi; p__Basidiomycota; c__Agaricomycetes; o__Russulales; f__Russulaceae; g__Russula; s__Russula_nauseosa	Russula	Symbiotroph	Ectomycorrhizal	Highly Probable	NULL	Rinaldi AC, et al. 2008. Fungal Diversity 33:1-45; Tedersoo L, et al. 2010. Mycorrhiza 20:217-263; http://mycorrhizas.info/ecmf.html		0	0	0	0	0	0	0	15	0	0	0	0	0	1	0	0	0	0	0	0	0	1	2	0
OTU31	k__Fungi; p__Ascomycota; c__Sordariomycetes; o__Hypocreales; f__Hypocreaceae; g__Trichoderma; s__Trichoderma_virens	Trichoderma virens	Symbiotroph	Endophyte	Probable	Endophyte detection method-culture (Hanada et al. 2008)	Hanada RE, et al. 2010. Fungal Biology 114:901-910		0	0	3	9	6	23	15	16	97	9	3	9	43	14	30	7	22	22	10	13	0	0	5	0
OTU328	k__Fungi; p__Basidiomycota; c__Agaricomycetes; o__Agaricales; f__Inocybaceae; g__Inocybe; s__Inocybe_rimosa	Inocybaceae	Symbiotroph	Ectomycorrhizal	Probable	Sensu stricto with the exclusion of Crepidotaceae, Tubariaceae, and Chromocyphellaceae; Pharmacology: muscarine, psilocybin, aeruginascen, unclarified alkaloids, or none	Matheny PB. 2009. McIlvainea 18:11-21		0	0	0	0	0	0	0	0	0	0	0	0	0	1	0	0	0	0	0	0	0	0	0	14
OTU340	k__Fungi; p__Basidiomycota; c__Agaricomycetes; o__Thelephorales; f__Thelephoraceae; g__Thelephora; s__Thelephora_ganbajun	Thelephora	Symbiotroph	Ectomycorrhizal	Highly Probable	NULL	Rinaldi AC, et al. 2008. Fungal Diversity 33:1-45; Tedersoo L, et al. 2010. Mycorrhiza 20:217-263; http://mycorrhizas.info/ecmf.html		0	0	25	0	0	0	0	0	1	0	0	0	0	0	0	0	0	0	0	0	0	11	17	0
OTU367	k__Fungi; p__Basidiomycota; c__Agaricomycetes; o__Thelephorales; f__Thelephoraceae; g__Tomentella; Unclassified	Tomentella	Symbiotroph	Ectomycorrhizal	Highly Probable	NULL	Rinaldi AC, et al. 2008. Fungal Diversity 33:1-45; Tedersoo L, et al. 2010. Mycorrhiza 20:217-263; http://mycorrhizas.info/ecmf.html		0	0	0	3	0	0	0	0	0	12	0	0	0	7	0	1	0	0	0	0	0	0	0	0
OTU383	k__Fungi; p__Basidiomycota; c__Agaricomycetes; o__Sebacinales; f__Sebacinaceae; g__Sebacina; Unclassified	Sebacina	Symbiotroph	Ectomycorrhizal-Orchid Mycorrhizal-Root Associated Biotroph	Possible	NULL	Rinaldi AC, et al. 2008. Fungal Diversity 33:1-45; Tedersoo L, et al. 2010. Mycorrhiza 20:217-263 (pro parte); http://mycorrhizas.info/ecmf.html; Weiss et al. doi: 10.1111/nph.13977 (many guilds)		0	0	0	0	0	0	18	0	0	0	0	0	0	0	0	0	0	0	0	0	0	0	0	0
OTU39	k__Fungi; p__Ascomycota; c__Lecanoromycetes; o__Umbilicariales; f__Umbilicariaceae; g__Umbilicaria; s__Umbilicaria_arctica	Umbilicaria	Symbiotroph	Lichenized	Highly Probable	NULL	Esslinger TL. 2014. North Dakota State University (http://www.ndsu.edu/pubweb/~esslinge/chcklst/chcklst7.htm)		8	6	4	1	25	0	5	0	6	4	11	0	35	0	1	3	14	21	14	0	12	29	1	113
OTU390	k__Fungi; p__Basidiomycota; c__Agaricomycetes; o__Cantharellales; f__Clavulinaceae; g__Clavulina; s__Clavulina_cinerea	Clavulina	Symbiotroph	Ectomycorrhizal	Highly Probable	NULL	Tedersoo L, et al. 2014. Science 346:1256688 (doi:10.1126/science.1256688)		0	0	0	0	0	0	0	0	0	0	0	0	0	0	0	0	0	0	0	0	0	0	0	9
OTU421	k__Fungi; p__Basidiomycota; c__Agaricomycetes; o__Russulales; f__Russulaceae; g__Lactifluus; s__Lactifluus_bertillonii	Lactifluus	Symbiotroph	Ectomycorrhizal	Highly Probable	NULL	List compiled by Sara Branco with input from Nhu Nguyen and Else Vellinga		0	0	0	0	0	0	0	0	0	0	0	0	9	0	0	0	0	0	0	0	0	1	0	0
OTU425	k__Fungi; p__Ascomycota; c__Lecanoromycetes; o__Umbilicariales; f__Umbilicariaceae; g__Umbilicaria; s__Umbilicaria_arctica	Umbilicaria	Symbiotroph	Lichenized	Highly Probable	NULL	Esslinger TL. 2014. North Dakota State University (http://www.ndsu.edu/pubweb/~esslinge/chcklst/chcklst7.htm)		0	0	0	0	0	0	12	0	0	0	0	0	0	0	0	6	0	0	0	0	0	0	15	0
OTU465	k__Fungi; p__Basidiomycota; c__Agaricomycetes; o__Boletales; f__Suillaceae; g__Suillus; s__Suillus_americanus	Suillus	Symbiotroph	Ectomycorrhizal	Highly Probable	NULL	Rinaldi AC, et al. 2008. Fungal Diversity 33:1-45; Tedersoo L, et al. 2010. Mycorrhiza 20:217-263; http://mycorrhizas.info/ecmf.html		0	0	3	0	0	0	0	0	0	1	0	0	0	0	0	0	1	0	0	0	2	0	2	2
OTU469	k__Fungi; p__Basidiomycota; c__Agaricomycetes; o__Thelephorales; f__Thelephoraceae; g__Tomentella; Unclassified	Tomentella	Symbiotroph	Ectomycorrhizal	Highly Probable	NULL	Rinaldi AC, et al. 2008. Fungal Diversity 33:1-45; Tedersoo L, et al. 2010. Mycorrhiza 20:217-263; http://mycorrhizas.info/ecmf.html		0	0	0	0	13	0	0	0	0	0	0	0	0	0	0	0	0	0	0	0	0	0	0	0
OTU49	k__Fungi; p__Basidiomycota; c__Agaricomycetes; o__Atheliales; f__Atheliaceae; g__Amphinema; Unclassified	Amphinema	Symbiotroph	Ectomycorrhizal	Highly Probable	NULL	Rinaldi AC, et al. 2008. Fungal Diversity 33:1-45; Tedersoo L, et al. 2010. Mycorrhiza 20:217-263; http://mycorrhizas.info/ecmf.html		6	28	15	18	0	25	11	19	37	4	25	20	10	0	0	0	17	22	0	0	0	0	0	0
OTU499	k__Fungi; p__Basidiomycota; c__Agaricomycetes; o__Russulales; f__Russulaceae; g__Russula; s__Russula_rosea	Russula	Symbiotroph	Ectomycorrhizal	Highly Probable	NULL	Rinaldi AC, et al. 2008. Fungal Diversity 33:1-45; Tedersoo L, et al. 2010. Mycorrhiza 20:217-263; http://mycorrhizas.info/ecmf.html		0	0	0	5	0	1	0	0	0	0	0	0	0	0	0	0	0	0	0	0	0	0	0	0
OTU519	k__Fungi; p__Basidiomycota; c__Agaricomycetes; o__Thelephorales; f__Thelephoraceae; g__Amaurodon; Unclassified	Amaurodon	Symbiotroph	Ectomycorrhizal	Possible	NULL	Rinaldi AC, et al. 2008. Fungal Diversity 33:1-45 (ECM); Tedersoo L, et al. 2010. Mycorrhiza 20:217-263 (not ECM)		0	0	0	0	9	0	0	0	0	0	0	0	0	0	0	1	0	0	0	0	0	0	0	0
OTU526	k__Fungi; p__Ascomycota; c__Eurotiomycetes; o__Eurotiales; f__Elaphomycetaceae; g__Elaphomyces; s__Elaphomyces_papillatus	Elaphomyces	Symbiotroph	Ectomycorrhizal	Highly Probable	Common name - false truffle	Rinaldi AC, et al. 2008. Fungal Diversity 33:1-45; Tedersoo L, et al. 2010. Mycorrhiza 20:217-263; http://mycorrhizas.info/ecmf.html		0	0	0	0	0	0	0	4	0	0	0	0	0	1	0	0	0	0	0	0	0	0	0	0
OTU56	k__Fungi; p__Basidiomycota; c__Agaricomycetes; o__Russulales; f__Russulaceae; g__Russula; Unclassified	Russula	Symbiotroph	Ectomycorrhizal	Highly Probable	NULL	Rinaldi AC, et al. 2008. Fungal Diversity 33:1-45; Tedersoo L, et al. 2010. Mycorrhiza 20:217-263; http://mycorrhizas.info/ecmf.html		15	10	9	14	37	6	0	7	13	0	21	20	9	6	15	0	5	14	0	5	18	0	0	0
OTU6	k__Fungi; p__Ascomycota; c__Pezizomycetes; o__Pezizales; f__Pyronemataceae; g__Wilcoxina; Unclassified	Wilcoxina	Symbiotroph	Ectomycorrhizal	Highly Probable	NULL	Rinaldi AC, et al. 2008. Fungal Diversity 33:1-45; Tedersoo L, et al. 2010. Mycorrhiza 20:217-263; http://mycorrhizas.info/ecmf.html		69	121	141	88	76	25	70	66	77	102	58	61	86	62	45	1	126	89	51	37	3	13	5	7
OTU613	k__Fungi; p__Basidiomycota; c__Agaricomycetes; o__Boletales; f__Rhizopogonaceae; g__Rhizopogon; Unclassified	Rhizopogon	Symbiotroph	Ectomycorrhizal	Highly Probable	Common name - false truffle	Rinaldi AC, et al. 2008. Fungal Diversity 33:1-45; Tedersoo L, et al. 2010. Mycorrhiza 20:217-263; http://mycorrhizas.info/ecmf.html		0	0	0	0	0	0	0	0	0	4	0	1	2	0	0	0	0	0	0	2	0	0	0	0
OTU619	k__Fungi; p__Ascomycota; c__Lecanoromycetes; o__Umbilicariales; f__Umbilicariaceae; g__Umbilicaria; s__Umbilicaria_arctica	Umbilicaria	Symbiotroph	Lichenized	Highly Probable	NULL	Esslinger TL. 2014. North Dakota State University (http://www.ndsu.edu/pubweb/~esslinge/chcklst/chcklst7.htm)		0	0	0	0	0	0	0	3	0	0	0	0	0	0	0	0	0	0	0	0	0	13	0	0
OTU667	k__Fungi; p__Ascomycota; c__Dothideomycetes; o__Pleosporales; f__Lentitheciaceae; g__Darksidea; s__Darksidea_zeta	Darksidea	Symbiotroph	Endophyte	Highly Probable	NULL	Knapp DG, et al. 2015. Persoonia 35:87-100		7	0	0	0	0	0	0	0	0	0	0	0	0	0	0	0	0	0	0	0	0	0	0	0
OTU670	k__Fungi; p__Ascomycota; c__Leotiomycetes; o__Helotiales; f__Helotiales_fam_Incertae_sedis; g__Cadophora; s__Cadophora_melinii	Cadophora	Symbiotroph	Endophyte	Highly Probable	Dark Septate Endophyte, known from plant roots.	Tedersoo L, et al. 2010. Mycorrhiza 20:217-263; Newsham 2011. New Phytologist 190:783-793 (as DSE)		0	0	0	0	0	0	0	0	1	0	0	0	0	0	0	0	0	0	0	0	0	0	0	0
OTU685	k__Fungi; p__Basidiomycota; c__Agaricomycetes; o__Russulales; f__Russulaceae; g__Russula; s__Russula_heterophylla	Russula	Symbiotroph	Ectomycorrhizal	Highly Probable	NULL	Rinaldi AC, et al. 2008. Fungal Diversity 33:1-45; Tedersoo L, et al. 2010. Mycorrhiza 20:217-263; http://mycorrhizas.info/ecmf.html		0	0	0	0	0	0	0	0	0	0	0	0	0	0	0	0	0	0	0	0	0	6	0	0
OTU691	k__Fungi; p__Ascomycota; c__Lecanoromycetes; o__Umbilicariales; f__Umbilicariaceae; g__Umbilicaria; Unclassified	Umbilicaria	Symbiotroph	Lichenized	Highly Probable	NULL	Esslinger TL. 2014. North Dakota State University (http://www.ndsu.edu/pubweb/~esslinge/chcklst/chcklst7.htm)		0	0	8	0	0	0	0	0	0	0	0	0	0	0	0	0	0	0	0	0	0	0	0	0
OTU74	k__Fungi; p__Basidiomycota; c__Agaricomycetes; o__Agaricales; f__Amanitaceae; g__Amanita; s__Amanita_griseofolia	Amanita	Symbiotroph	Ectomycorrhizal	Highly Probable	NULL	Rinaldi AC, et al. 2008. Fungal Diversity 33:1-45; Tedersoo L, et al. 2010. Mycorrhiza 20:217-263; http://mycorrhizas.info/ecmf.html		0	10	29	26	39	10	6	20	19	31	27	11	0	10	31	0	47	0	0	0	0	7	1	0
OTU78	k__Fungi; p__Ascomycota; c__Leotiomycetes; o__Helotiales; f__Helotiales_fam_Incertae_sedis; g__Cadophora; s__Cadophora_orchidicola	Cadophora	Symbiotroph	Endophyte	Highly Probable	Dark Septate Endophyte, known from plant roots.	Tedersoo L, et al. 2010. Mycorrhiza 20:217-263; Newsham 2011. New Phytologist 190:783-793 (as DSE)		9	1	3	0	5	35	1	2	13	7	1	10	0	0	3	0	0	3	4	16	5	0	15	0
OTU784	k__Fungi; p__Ascomycota; c__Leotiomycetes; o__Helotiales; f__Vibrisseaceae; g__Phialocephala; s__Phialocephala_fortinii	Phialocephala	Symbiotroph	Endophyte	Highly Probable	Dark Septate Endophyte, known from plant roots.	Newsham 2011. New Phytologist 190:783-793 (as DSE)		0	0	0	3	0	0	0	0	0	0	0	0	0	0	3	1	0	0	0	0	0	0	0	0
OTU878	k__Fungi; p__Basidiomycota; c__Agaricomycetes; o__Russulales; f__Russulaceae; g__Russula; Unclassified	Russula	Symbiotroph	Ectomycorrhizal	Highly Probable	NULL	Rinaldi AC, et al. 2008. Fungal Diversity 33:1-45; Tedersoo L, et al. 2010. Mycorrhiza 20:217-263; http://mycorrhizas.info/ecmf.html		5	3	1	8	0	0	1	3	0	0	6	0	0	0	0	0	3	14	21	0	0	0	0	0

## Sheet: pathogenic fungi
Table S2. Potential pathogenic fungi prediction of the detected fungi based on the FUNGuild analysis. H2: soil samples obtained from 2-year-old healthy AG plants; D2: soil samples obtained from 2-year-old diseased AG plants; H3: soil samples obtained from 3-year-old healthy AG plants; D3: soil samples obtained from 3-year-old diseased AG plants; H4: soil samples obtained from 4-year-old healthy A…
#OTU ID	taxonomy	Taxon	Trophic Mode	Guild	Citation/Source	H2-1	H2-2	H2-3	H2-4	D2-1	D2-2	D2-3	D2-4	H3-1	H3-2	H3-3	H3-4	D3-1	D3-2	D3-3	D3-4	H4-1	H4-2	H4-3	H4-4	D4-1	D4-2	D4-3	D4-4
OTU100	k__Fungi; p__Ascomycota; c__Sordariomycetes; o__Sordariales; f__Lasiosphaeriaceae; g__Cladorrhinum; s__Cladorrhinum_bulbillosum	Cladorrhinum	Pathotroph-Saprotroph-Symbiotroph	Animal Pathogen-Dung Saprotroph-Endophyte-Plant Saprotroph-Soil Saprotroph-Wood Saprotroph	Seehann G, et al. 1975. List of Fungi in Soft-Rot Tissue Tests. Institute fur Holzbiologie und Holzschutz, Bundesforschungsanstalt fur Forst - und Holzwirtshaft, Hamburg - Lohbrugge, Germany; Carmaran CC, et al.2015. Mycological Progress 14:94; Irinyi L, et al. 2015. Medical Mycology 53:313-337	0	0	0	0	0	0	0	0	0	0	0	0	0	0	0	0	5	0	52	13	0	0	1	0
OTU106	k__Fungi; p__Ascomycota; c__Dothideomycetes; o__Pleosporales; f__Leptosphaeriaceae; g__Leptosphaeria; Unclassified	Leptosphaeria	Pathotroph	Plant Pathogen	Tedersoo L, et al. 2014. Science 346:1256688	0	0	0	18	0	0	0	0	0	0	0	0	0	0	62	4	0	0	0	0	0	0	0	0
OTU107	k__Fungi; p__Ascomycota; c__Sordariomycetes; o__Sordariales; f__Chaetomiaceae; g__Melanocarpus; s__Melanocarpus_albomyces	Chaetomiaceae	Pathotroph-Saprotroph-Symbiotroph	Animal Pathogen-Dung Saprotroph-Endophyte-Epiphyte-Plant Saprotroph-Wood Saprotroph	Seehann G, et al. 1975. List of Fungi in Soft-Rot Tissue Tests. Institute fur Holzbiologie und Holzschutz, Bundesforschungsanstalt fur Forst - und Holzwirtshaft, Hamburg - Lohbrugge, Germany; Cannon PF, Kirk PM. 2007. Fungal Families of the World. CAB International, Cambridge; Bills GF, et al. 2013. Current Opinion in microbiology, 16:549-565; Tedersoo L, et al. 2014. Science 346:1256688; Irinyi …	0	0	1	4	0	2	0	0	0	0	1	5	2	1	0	0	0	23	0	4	0	3	0	2
OTU109	k__Fungi; p__Ascomycota; c__Sordariomycetes; o__Coniochaetales; f__Coniochaetaceae; g__Coniochaeta; Unclassified	Coniochaeta	Pathotroph-Saprotroph-Symbiotroph	Animal Pathogen-Dung Saprotroph-Endophyte-Lichen Parasite-Plant Pathogen-Undefined Saprotroph	Bell A. 1983. Dung Fungi: An Illustrated Guide to Coprophilous Fungi in New Zealand. Victoria University Press, Wellington; Damm U, et al. 2010. Persoonia 24:60-80; Costa IPMW, et al. 2012. Mycotaxon 119:26; Tedersoo L, et al. 2014. Science 346:1256688 (doi:10.1126/science.1256688); Irinyi L, et al. 2015. Medical Mycology 53:313-337; Lawrey JD, Diederich P. 2016. URL: http://www.lichenicolous.net…	0	0	0	0	0	0	0	0	0	0	0	0	0	0	0	0	0	54	0	0	0	3	0	0
OTU120	k__Fungi; p__Ascomycota; c__Eurotiomycetes; o__Chaetothyriales; f__Cyphellophoraceae; g__Cyphellophora; Unclassified	Cyphellophora	Pathotroph-Saprotroph	Animal Pathogen-Undefined Saprotroph	Tedersoo L, et al. 2014. Science 346:1256688 (doi:10.1126/science.1256688); Irinyi L, et al. 2015. Medical Mycology 53:313-337	0	0	0	0	26	19	0	21	0	0	0	0	8	0	0	0	0	0	0	0	0	0	0	0
OTU122	k__Fungi; p__Basidiomycota; c__Agaricomycetes; o__Polyporales; f__Ganodermataceae; g__Ganoderma; Unclassified	Ganodermataceae	Pathotroph-Saprotroph	Plant Pathogen-Wood Saprotroph	Cannon PF, Kirk PM. 2007. Fungal Families of the World. CAB International, Cambridge	0	0	4	0	0	0	0	0	9	0	3	0	13	0	8	0	41	7	0	48	0	0	0	0
OTU143	k__Fungi; p__Ascomycota; c__Sordariomycetes; o__Sordariales; f__Chaetomiaceae; Unclassified; Unclassified	Chaetomiaceae	Pathotroph-Saprotroph-Symbiotroph	Animal Pathogen-Dung Saprotroph-Endophyte-Epiphyte-Plant Saprotroph-Wood Saprotroph	Seehann G, et al. 1975. List of Fungi in Soft-Rot Tissue Tests. Institute fur Holzbiologie und Holzschutz, Bundesforschungsanstalt fur Forst - und Holzwirtshaft, Hamburg - Lohbrugge, Germany; Cannon PF, Kirk PM. 2007. Fungal Families of the World. CAB International, Cambridge; Bills GF, et al. 2013. Current Opinion in microbiology, 16:549-565; Tedersoo L, et al. 2014. Science 346:1256688; Irinyi …	0	0	0	0	3	0	0	0	0	1	0	0	0	0	0	2	9	3	7	0	15	1	1	11
OTU147	k__Fungi; p__Ascomycota; c__Leotiomycetes; o__Helotiales; f__Helotiales_fam_Incertae_sedis; g__Chalara; s__Chalara_heteroderae	Chalara	Pathotroph-Saprotroph-Symbiotroph	Endophyte-Plant Pathogen-Wood Saprotroph	Duncan CG, Eslyn WE. 1966. Mycologia 58:642-645; Tedersoo L, et al. 2014. Science 346:1256688	0	13	0	0	0	0	0	0	5	0	0	0	0	0	0	17	0	0	0	36	0	0	0	0
OTU153	k__Fungi; p__Ascomycota; c__Dothideomycetes; o__Botryosphaeriales; f__Botryosphaeriaceae; g__Neofusicoccum; s__Neofusicoccum_ribis	Neofusicoccum	Pathotroph	Plant Pathogen	Tedersoo L, et al. 2014. Science 346:1256688	0	0	0	0	0	0	0	0	0	0	0	0	0	0	0	10	0	0	0	0	0	0	1	27
OTU16	k__Fungi; p__Ascomycota; c__Eurotiomycetes; o__Chaetothyriales; f__Chaetothyriaceae; Unclassified; Unclassified	Chaetothyriaceae	Pathotroph-Symbiotroph	Epiphyte-Plant Pathogen	Cannon PF, Kirk PM. 2007. Fungal Families of the World. CAB International, Cambridge	131	19	63	38	21	18	6	16	43	142	45	91	87	26	11	0	0	0	0	0	13	3	0	0
OTU164	k__Fungi; p__Ascomycota; c__Dothideomycetes; o__Pleosporales; f__Periconiaceae; g__Periconia; s__Periconia_byssoides	Periconia byssoides	Pathotroph	Plant Pathogen	http://www.apsnet.org/publications/commonnames/Pages/default.aspx	0	0	0	0	25	0	10	10	0	0	0	9	0	0	0	0	12	0	0	0	0	0	0	0
OTU169	k__Fungi; p__Ascomycota; c__Eurotiomycetes; o__Eurotiales; f__Aspergillaceae; g__Penicillium; s__Penicillium_oxalicum	Penicillium oxalicum	Pathotroph	Plant Pathogen	http://www.apsnet.org/publications/commonnames/Pages/default.aspx	1	0	0	1	3	27	0	1	0	0	1	0	0	0	0	1	0	0	0	0	0	0	0	0
OTU170	k__Fungi; p__Basidiobolomycota; c__Basidiobolomycetes; o__Basidiobolales; f__Basidiobolaceae; g__Basidiobolus; Unclassified	Basidiobolaceae	Pathotroph-Saprotroph-Symbiotroph	Animal Endosymbiont-Animal Pathogen-Undefined Saprotroph	Cannon PF, Kirk PM. 2007. Fungal Families of the World. CAB International, Cambridge	0	0	0	0	0	0	0	0	0	0	0	31	0	0	0	0	0	0	0	0	0	0	0	0
OTU179	k__Fungi; p__Ascomycota; c__Eurotiomycetes; o__Chaetothyriales; f__Herpotrichiellaceae; g__Exophiala; Unclassified	Exophiala	Pathotroph-Saprotroph	Animal Pathogen-Undefined Saprotroph	Tedersoo L, et al. 2014. Science 346:1256688, Nagy GL, et al. 2014. Nature Communications 5:4471	0	0	0	0	8	0	0	0	0	0	0	0	28	5	0	0	0	0	0	0	0	0	0	0
OTU180	k__Fungi; p__Ascomycota; c__Eurotiomycetes; o__Chaetothyriales; f__Herpotrichiellaceae; g__Exophiala; Unclassified	Exophiala	Pathotroph-Saprotroph	Animal Pathogen-Undefined Saprotroph	Tedersoo L, et al. 2014. Science 346:1256688, Nagy GL, et al. 2014. Nature Communications 5:4471	0	0	0	0	0	10	0	0	0	0	0	0	0	0	0	0	0	6	0	0	11	0	5	0
OTU188	k__Fungi; p__Ascomycota; c__Sordariomycetes; o__Coniochaetales; f__Coniochaetaceae; g__Coniochaeta; Unclassified	Coniochaeta	Pathotroph-Saprotroph-Symbiotroph	Animal Pathogen-Dung Saprotroph-Endophyte-Lichen Parasite-Plant Pathogen-Undefined Saprotroph	Bell A. 1983. Dung Fungi: An Illustrated Guide to Coprophilous Fungi in New Zealand. Victoria University Press, Wellington; Damm U, et al. 2010. Persoonia 24:60-80; Costa IPMW, et al. 2012. Mycotaxon 119:26; Tedersoo L, et al. 2014. Science 346:1256688 (doi:10.1126/science.1256688); Irinyi L, et al. 2015. Medical Mycology 53:313-337; Lawrey JD, Diederich P. 2016. URL: http://www.lichenicolous.net…	0	0	0	0	0	0	0	0	0	0	0	0	0	0	0	0	0	0	0	0	29	0	36	0
OTU202	k__Fungi; p__Basidiomycota; c__Agaricomycetes; o__Agaricales; f__Entolomataceae; g__Entoloma; Unclassified	Entoloma	Pathotroph-Saprotroph-Symbiotroph	Ectomycorrhizal-Fungal Parasite-Soil Saprotroph-Undefined Saprotroph	Rinaldi AC, et al. 2008. Fungal Diversity 33:1-45 (ECM/(not ECM); Tedersoo L, et al. 2010. Mycorrhiza 20:217-263 (sensu stricto); http://mycorrhizas.info/ecmf.html (ECM/(not ECM)	0	0	0	0	0	19	0	0	0	0	0	0	0	0	0	2	14	0	0	0	0	0	6	0
OTU210	k__Fungi; p__Ascomycota; c__Sordariomycetes; o__Sordariales; f__Chaetomiaceae; g__Ovatospora; s__Ovatospora_pseudomollicella	Chaetomiaceae	Pathotroph-Saprotroph-Symbiotroph	Animal Pathogen-Dung Saprotroph-Endophyte-Epiphyte-Plant Saprotroph-Wood Saprotroph	Seehann G, et al. 1975. List of Fungi in Soft-Rot Tissue Tests. Institute fur Holzbiologie und Holzschutz, Bundesforschungsanstalt fur Forst - und Holzwirtshaft, Hamburg - Lohbrugge, Germany; Cannon PF, Kirk PM. 2007. Fungal Families of the World. CAB International, Cambridge; Bills GF, et al. 2013. Current Opinion in microbiology, 16:549-565; Tedersoo L, et al. 2014. Science 346:1256688; Irinyi …	0	0	0	0	0	0	4	0	0	0	0	0	0	0	0	0	0	0	0	0	0	0	0	28
OTU214	k__Fungi; p__Ascomycota; c__Sordariomycetes; o__Microascales; f__Microascaceae; g__Acaulium; Unclassified	Microascaceae	Pathotroph-Saprotroph-Symbiotroph	Animal Pathogen-Endophyte-Plant Pathogen-Undefined Saprotroph	Cannon PF, Kirk PM. 2007. Fungal Families of the World. CAB International, Cambridge	0	0	0	0	0	0	7	0	4	9	0	0	0	0	0	0	17	0	0	0	6	12	10	0
OTU251	k__Fungi; p__Ascomycota; c__Eurotiomycetes; o__Chaetothyriales; f__Chaetothyriales_fam_Incertae_sedis; g__Strelitziana; Unclassified	Strelitziana	Pathotroph	Plant Pathogen	Tedersoo L, et al. 2014. Science 346:1256688	0	0	0	0	0	0	0	0	0	0	0	0	0	0	0	0	0	0	23	0	0	0	0	0
OTU262	k__Fungi; p__Chytridiomycota; c__Spizellomycetes; o__Spizellomycetales; f__Spizellomycetaceae; g__Spizellomyces; Unclassified	Spizellomycetaceae	Pathotroph	Plant Pathogen-Undefined Parasite-Undefined Saprotroph	Cannon PF, Kirk PM. 2007. Fungal Families of the World. CAB International, Cambridge	15	0	0	0	2	0	0	0	0	0	0	0	6	0	0	0	0	0	0	0	0	3	0	0
OTU275	k__Fungi; p__Chytridiomycota; c__Chytridiomycetes; o__Chytridiales; f__Chytridiaceae; g__Dendrochytridium; s__Dendrochytridium_crassum	Chytridiaceae	Pathotroph-Saprotroph	Algal Parasite-Fungal Parasite-Undefined Saprotroph	Cannon PF, Kirk PM. 2007. Fungal Families of the World. CAB International, Cambridge	0	0	0	0	0	0	0	2	0	4	0	0	0	0	0	0	0	4	0	0	0	0	0	0
OTU28	k__Fungi; p__Ascomycota; c__Sordariomycetes; o__Glomerellales; f__Glomerellaceae; g__Colletotrichum; Unclassified	Colletotrichum	Pathotroph-Symbiotroph	Endophyte-Plant Pathogen	Costa IPMW, et al. 2012. Mycotaxon 119:26; Tedersoo L, et al. 2014. Science 346:1256688; http://www.apsnet.org/publications/commonnames/Pages/default.aspx	0	0	0	0	0	0	4	0	0	0	0	0	0	0	0	0	0	0	0	0	448	86	47	57
OTU280	k__Fungi; p__Ascomycota; c__Dothideomycetes; o__Pleosporales; f__Leptosphaeriaceae; g__Leptosphaeria; Unclassified	Leptosphaeria	Pathotroph	Plant Pathogen	Tedersoo L, et al. 2014. Science 346:1256688	0	0	0	0	0	12	0	0	0	11	0	0	0	0	0	0	0	0	0	0	0	0	0	6
OTU285	k__Fungi; p__Ascomycota; c__Leotiomycetes; o__Helotiales; f__Myxotrichaceae; g__Oidiodendron; Unclassified	Oidiodendron	Pathotroph-Symbiotroph	Ericoid Mycorrhizal	Newsham 2011. New Phytologist 190:783-793 (as DSE)	0	0	0	0	0	0	0	0	0	0	0	0	0	27	0	0	0	0	0	0	0	0	0	0
OTU288	k__Fungi; p__Ascomycota; c__Dothideomycetes; o__Pleosporales; f__Pleosporaceae; g__Exserohilum; Unclassified	Exserohilum	Pathotroph	Plant Pathogen	Tedersoo L, et al. 2014. Science 346:1256688	0	0	0	0	0	0	0	0	0	0	0	0	0	0	0	0	0	0	0	0	23	0	0	0
OTU29	k__Fungi; p__Ascomycota; c__Eurotiomycetes; o__Eurotiales; f__Trichocomaceae; g__Thermomyces; s__Thermomyces_lanuginosus	Thermomyces	Pathotroph-Symbiotroph	Endophyte-Plant Pathogen	Costa IPMW, et al. 2012. Mycotaxon 119:26	97	17	12	16	24	6	0	0	11	38	3	1	20	6	5	9	42	20	3	20	55	68	44	72
OTU299	k__Fungi; p__Ascomycota; c__Leotiomycetes; o__Erysiphales; f__Erysiphaceae; g__Blumeria; s__Blumeria_graminis	Blumeria	Pathotroph	Plant Pathogen	Tedersoo L, et al. 2014. Science 346:1256688	0	0	0	0	0	0	0	0	0	0	0	0	0	0	0	0	0	0	0	0	0	21	0	0
OTU300	k__Fungi; p__Ascomycota; c__Leotiomycetes; o__Helotiales; f__Helotiales_fam_Incertae_sedis; g__Rhexocercosporidium; s__Rhexocercosporidium_panacis	Rhexocercosporidium	Pathotroph	Plant Pathogen	Tedersoo L, et al. 2014. Science 346:1256688	0	0	0	0	0	0	0	0	0	2	4	6	1	4	0	2	0	0	0	0	0	0	0	0
OTU310	k__Fungi; p__Chytridiomycota; c__Spizellomycetes; o__Spizellomycetales; f__Spizellomycetaceae; g__Spizellomyces; s__Spizellomyces_pseudodichotomus	Spizellomycetaceae	Pathotroph	Plant Pathogen-Undefined Parasite-Undefined Saprotroph	Cannon PF, Kirk PM. 2007. Fungal Families of the World. CAB International, Cambridge	0	0	0	0	0	0	0	0	0	0	0	0	0	0	0	0	0	0	0	0	15	0	0	5
OTU313	k__Fungi; p__Ascomycota; c__Dothideomycetes; o__Dothideales; f__Aureobasidiaceae; g__Aureobasidium; Unclassified	Aureobasidium	Pathotroph-Saprotroph-Symbiotroph	Animal Pathogen-Endophyte-Epiphyte-Plant Pathogen-Undefined Saprotroph	Costa IPMW, et al. 2012. Mycotaxon 119:26; Tedersoo L, et al. 2014. Science 346:1256688; Wachowska U, Glowacka K. 2014. Biocontrol 59:pp 635-645; Irinyia L, Lacknerb M, de Hoog GS, Meyer W. 2016. Fungal Biology 120:125-136; http://www.apsnet.org/publications/commonnames/Pages/default.aspx	0	5	4	0	0	0	0	0	6	0	0	0	0	0	0	7	0	0	11	0	0	4	5	0
OTU318	k__Fungi; p__Ascomycota; c__Dothideomycetes; o__Pleosporales; f__Pleosporaceae; g__Stemphylium; Unclassified	Stemphylium	Pathotroph-Saprotroph	Plant Pathogen-Wood Saprotroph	Duncan CG, Eslyn WE. 1966. Mycologia 58:642-664; Seehann G, et al. 1975. List of Fungi in Soft-Rot Tissue Tests. Institute fur Holzbiologie und Holzschutz, Bundesforschungsanstalt fur Forst - und Holzwirtshaft, Hamburg - Lohbrugge, Germany; Costa IPMW, et al. 2012. Mycotaxon 119:26; Tedersoo L, et al. 2014. Science 346:1256688; http://www.apsnet.org/publications/commonnames/Pages/default.aspx	0	0	1	0	0	0	0	12	0	0	0	0	0	0	0	0	0	0	0	0	0	0	0	0
OTU32	k__Fungi; p__Ascomycota; c__Eurotiomycetes; o__Chaetothyriales; f__Herpotrichiellaceae; g__Exophiala; s__Exophiala_equina	Exophiala	Pathotroph-Saprotroph	Animal Pathogen-Undefined Saprotroph	Tedersoo L, et al. 2014. Science 346:1256688, Nagy GL, et al. 2014. Nature Communications 5:4471	6	15	0	0	32	10	1	31	0	34	14	19	0	29	42	9	5	21	0	105	11	12	0	0
OTU329	k__Fungi; p__Basidiomycota; c__Agaricomycetes; o__Agaricales; f__Strophariaceae; Unclassified; Unclassified	Strophariaceae	Pathotroph-Saprotroph	Dung Saprotroph-Plant Parasite-Soil Saprotroph-Undefined Saprotroph-Wood Saprotroph	Cannon PF, Kirk PM. 2007. Fungal Families of the World. CAB International, Cambridge	0	0	0	0	0	5	0	8	0	0	1	0	0	0	0	0	0	0	0	0	0	0	0	0
OTU339	k__Fungi; p__Ascomycota; c__Sordariomycetes; o__Sordariales; f__Chaetomiaceae; Unclassified; Unclassified	Chaetomiaceae	Pathotroph-Saprotroph-Symbiotroph	Animal Pathogen-Dung Saprotroph-Endophyte-Epiphyte-Plant Saprotroph-Wood Saprotroph	Seehann G, et al. 1975. List of Fungi in Soft-Rot Tissue Tests. Institute fur Holzbiologie und Holzschutz, Bundesforschungsanstalt fur Forst - und Holzwirtshaft, Hamburg - Lohbrugge, Germany; Cannon PF, Kirk PM. 2007. Fungal Families of the World. CAB International, Cambridge; Bills GF, et al. 2013. Current Opinion in microbiology, 16:549-565; Tedersoo L, et al. 2014. Science 346:1256688; Irinyi …	0	0	0	0	0	0	0	0	0	0	5	0	0	0	0	0	0	0	13	0	0	0	0	0
OTU346	k__Fungi; p__Ascomycota; c__Sordariomycetes; o__Sordariales; f__Chaetomiaceae; Unclassified; Unclassified	Chaetomiaceae	Pathotroph-Saprotroph-Symbiotroph	Animal Pathogen-Dung Saprotroph-Endophyte-Epiphyte-Plant Saprotroph-Wood Saprotroph	Seehann G, et al. 1975. List of Fungi in Soft-Rot Tissue Tests. Institute fur Holzbiologie und Holzschutz, Bundesforschungsanstalt fur Forst - und Holzwirtshaft, Hamburg - Lohbrugge, Germany; Cannon PF, Kirk PM. 2007. Fungal Families of the World. CAB International, Cambridge; Bills GF, et al. 2013. Current Opinion in microbiology, 16:549-565; Tedersoo L, et al. 2014. Science 346:1256688; Irinyi …	0	0	0	0	0	0	0	0	0	0	0	0	0	0	0	0	0	0	0	0	9	3	7	0
OTU35	k__Fungi; p__Ascomycota; c__Sordariomycetes; o__Sordariales; f__Chaetomiaceae; Unclassified; Unclassified	Chaetomiaceae	Pathotroph-Saprotroph-Symbiotroph	Animal Pathogen-Dung Saprotroph-Endophyte-Epiphyte-Plant Saprotroph-Wood Saprotroph	Seehann G, et al. 1975. List of Fungi in Soft-Rot Tissue Tests. Institute fur Holzbiologie und Holzschutz, Bundesforschungsanstalt fur Forst - und Holzwirtshaft, Hamburg - Lohbrugge, Germany; Cannon PF, Kirk PM. 2007. Fungal Families of the World. CAB International, Cambridge; Bills GF, et al. 2013. Current Opinion in microbiology, 16:549-565; Tedersoo L, et al. 2014. Science 346:1256688; Irinyi …	0	1	0	0	59	15	27	72	40	39	29	34	10	6	3	7	10	0	0	0	0	1	3	0
OTU351	k__Fungi; p__Ascomycota; c__Dothideomycetes; o__Pleosporales; f__Phaeosphaeriaceae; Unclassified; Unclassified	Phaeosphaeriaceae	Pathotroph-Saprotroph	Fungal Parasite-Plant Pathogen-Plant Saprotroph	Cannon PF, Kirk PM. 2007. Fungal Families of the World. CAB International, Cambridge	0	0	0	0	0	0	0	6	0	0	0	0	0	0	0	0	0	0	0	0	0	0	0	0
OTU355	k__Fungi; p__Ascomycota; c__Dothideomycetes; o__Pleosporales; f__Pleosporaceae; g__Alternaria; Unclassified	Alternaria	Pathotroph-Saprotroph-Symbiotroph	Animal Pathogen-Endophyte-Plant Pathogen-Wood Saprotroph	Duncan CG, Eslyn WE. 1966. Mycologia 58:642-664; Seehann G, et al. 1975. List of Fungi in Soft-Rot Tissue Tests. Institute fur Holzbiologie und Holzschutz, Bundesforschungsanstalt fur Forst - und Holzwirtshaft, Hamburg - Lohbrugge, Germany; Tedersoo L, et al. 2014. Science 346:125688	0	0	0	0	0	0	0	0	0	0	0	0	0	0	0	0	0	0	0	0	0	11	0	3
OTU356	k__Fungi; p__Ascomycota; c__Dothideomycetes; o__Pleosporales; f__Massarinaceae; g__Massarina; Unclassified	Massarina	Pathotroph-Saprotroph	Plant Pathogen-Undefined Saprotroph	Tedersoo L, et al. 2014. Science 346:1256688	0	0	0	0	0	0	0	0	0	0	0	0	0	0	0	0	5	0	0	0	0	0	30	0
OTU359	k__Fungi; p__Ascomycota; c__Eurotiomycetes; o__Chaetothyriales; f__Herpotrichiellaceae; g__Exophiala; s__Exophiala_xenobiotica	Exophiala	Pathotroph-Saprotroph	Animal Pathogen-Undefined Saprotroph	Tedersoo L, et al. 2014. Science 346:1256688, Nagy GL, et al. 2014. Nature Communications 5:4471	0	0	0	0	0	0	0	0	0	0	0	0	0	0	0	0	0	0	10	0	0	0	0	0
OTU364	k__Fungi; p__Ascomycota; c__Dothideomycetes; o__Pleosporales; f__Pleosporaceae; g__Bipolaris; Unclassified	Bipolaris	Pathotroph	Plant Pathogen	Tedersoo L, et al. 2014. Science 346:1256688	0	0	0	0	0	0	0	0	0	0	0	0	0	0	0	0	0	0	0	0	0	0	11	17
OTU366	k__Fungi; p__Ascomycota; c__Eurotiomycetes; o__Chaetothyriales; f__Herpotrichiellaceae; g__Exophiala; s__Exophiala_salmonis	Exophiala	Pathotroph-Saprotroph	Animal Pathogen-Undefined Saprotroph	Tedersoo L, et al. 2014. Science 346:1256688, Nagy GL, et al. 2014. Nature Communications 5:4471	0	0	0	0	16	0	0	0	0	0	0	0	0	0	0	0	0	0	0	0	0	0	0	0
OTU37	k__Fungi; p__Ascomycota; c__Sordariomycetes; o__Sordariales; f__Chaetomiaceae; g__Arcopilus; s__Arcopilus_aureus	Chaetomiaceae	Pathotroph-Saprotroph-Symbiotroph	Animal Pathogen-Dung Saprotroph-Endophyte-Epiphyte-Plant Saprotroph-Wood Saprotroph	Seehann G, et al. 1975. List of Fungi in Soft-Rot Tissue Tests. Institute fur Holzbiologie und Holzschutz, Bundesforschungsanstalt fur Forst - und Holzwirtshaft, Hamburg - Lohbrugge, Germany; Cannon PF, Kirk PM. 2007. Fungal Families of the World. CAB International, Cambridge; Bills GF, et al. 2013. Current Opinion in microbiology, 16:549-565; Tedersoo L, et al. 2014. Science 346:1256688; Irinyi …	3	4	14	3	7	55	127	17	4	9	43	42	15	16	2	0	8	0	0	5	0	0	0	0
OTU370	k__Fungi; p__Ascomycota; c__Dothideomycetes; o__Pleosporales; f__Pleosporaceae; g__Dichotomophthora; s__Dichotomophthora_lutea	Pleosporaceae	Pathotroph-Saprotroph	Endophyte-Lichen Parasite-Plant Pathogen-Undefined Saprotroph	Cannon PF, Kirk PM. 2007. Fungal Families of the World. CAB International, Cambridge; David AS, et al. 2016. Microbial Ecology 71:912-926; Lawrey JD, Diederich P. 2016. URL: http://www.lichenicolous.net [24 May 2017]	0	0	0	0	0	0	0	0	0	0	0	0	0	0	12	0	0	0	0	0	0	0	0	0
OTU392	k__Fungi; p__Basidiomycota; c__Agaricomycetes; o__Cantharellales; f__Ceratobasidiaceae; Unclassified; Unclassified	Ceratobasidiaceae	Pathotroph-Saprotroph-Symbiotroph	Endomycorrhizal-Plant Pathogen-Undefined Saprotroph	Cannon PF, Kirk PM. 2007. Fungal Families of the World. CAB International, Cambridge	0	0	0	0	0	0	0	10	0	0	0	0	0	0	0	0	0	0	0	0	0	0	0	0
OTU397	k__Fungi; p__Ascomycota; c__Dothideomycetes; o__Pleosporales; f__Didymosphaeriaceae; Unclassified; Unclassified	Didymosphaeriaceae	Pathotroph-Saprotroph-Symbiotroph	Endophyte-Lichen Parasite-Plant Pathogen-Undefined Saprotroph	Cannon PF, Kirk PM. 2007. Fungal Families of the World. CAB International, Cambridge; Massimo NC, et al. 2015. Microbial Ecology 70:61-76	0	0	0	0	0	0	0	0	0	0	0	0	0	0	0	0	0	0	12	0	0	0	1	0
OTU410	k__Fungi; p__Ascomycota; c__Sordariomycetes; o__Glomerellales; f__Glomerellaceae; g__Colletotrichum; s__Colletotrichum_phaseolorum	Colletotrichum	Pathotroph-Symbiotroph	Endophyte-Plant Pathogen	Costa IPMW, et al. 2012. Mycotaxon 119:26; Tedersoo L, et al. 2014. Science 346:1256688; http://www.apsnet.org/publications/commonnames/Pages/default.aspx	0	0	2	0	3	3	0	0	0	0	0	0	0	0	0	0	0	0	0	0	0	0	0	0
OTU412	k__Fungi; p__Ascomycota; c__Dothideomycetes; o__Pleosporales; f__Pleosporaceae; g__Alternaria; s__Alternaria_chlamydosporigena	Alternaria	Pathotroph-Saprotroph-Symbiotroph	Animal Pathogen-Endophyte-Plant Pathogen-Wood Saprotroph	Duncan CG, Eslyn WE. 1966. Mycologia 58:642-664; Seehann G, et al. 1975. List of Fungi in Soft-Rot Tissue Tests. Institute fur Holzbiologie und Holzschutz, Bundesforschungsanstalt fur Forst - und Holzwirtshaft, Hamburg - Lohbrugge, Germany; Tedersoo L, et al. 2014. Science 346:125688	0	0	0	0	0	0	0	0	0	0	0	0	0	0	0	0	5	0	0	0	6	0	0	0
OTU413	k__Fungi; p__Basidiomycota; c__Agaricomycetes; o__Russulales; f__Peniophoraceae; g__Peniophora; Unclassified	Peniophora	Pathotroph-Saprotroph	Plant Pathogen-Wood Saprotroph	Tedersoo L, et al. 2014. Science 346:1256688	0	0	0	0	0	0	0	0	0	0	0	0	0	0	0	0	0	8	0	0	0	0	0	12
OTU415	k__Fungi; p__Ascomycota; c__Eurotiomycetes; o__Chaetothyriales; f__Herpotrichiellaceae; Unclassified; Unclassified	Herpotrichiellaceae	Pathotroph-Saprotroph	Animal Pathogen-Fungal Parasite-Undefined Saprotroph	Cannon PF, Kirk PM. 2007. Fungal Families of the World. CAB International, Cambridge	0	0	0	0	5	0	0	0	0	6	0	0	0	0	0	0	0	0	0	0	0	0	0	0
OTU428	k__Fungi; p__Ascomycota; c__Eurotiomycetes; o__Chaetothyriales; f__Cyphellophoraceae; g__Cyphellophora; Unclassified	Cyphellophora	Pathotroph-Saprotroph	Animal Pathogen-Undefined Saprotroph	Tedersoo L, et al. 2014. Science 346:1256688 (doi:10.1126/science.1256688); Irinyi L, et al. 2015. Medical Mycology 53:313-337	0	0	0	0	8	0	0	0	0	0	0	0	0	0	0	0	0	0	0	0	0	0	0	0
OTU429	k__Fungi; p__Ascomycota; c__Sordariomycetes; o__Coniochaetales; f__Coniochaetaceae; Unclassified; Unclassified	Coniochaetaceae	Pathotroph-Saprotroph-Symbiotroph	Animal Pathogen-Dung Saprotroph-Endophyte-Lichen Parasite-Plant Pathogen-Undefined Saprotroph	Cannon PF, Kirk PM. 2007. Fungal Families of the World. CAB International, Cambridge; Damm U, et al. 2010. Persoonia 24:60-80; Irinyi L, et al. 2015. Medical Mycology 53:313-337; Lawrey JD, Diederich P. 2016. URL: http://www.lichenicolous.net [24 May 2017]	0	0	0	0	10	0	0	0	0	0	0	0	0	0	0	0	0	0	0	0	0	0	0	0
OTU43	k__Fungi; p__Basidiomycota; c__Agaricomycetes; o__Cantharellales; f__Ceratobasidiaceae; Unclassified; Unclassified	Ceratobasidiaceae	Pathotroph-Saprotroph-Symbiotroph	Endomycorrhizal-Plant Pathogen-Undefined Saprotroph	Cannon PF, Kirk PM. 2007. Fungal Families of the World. CAB International, Cambridge	0	7	0	0	0	6	0	10	0	0	0	0	10	71	283	87	0	0	0	0	0	0	0	0
OTU449	k__Fungi; p__Ascomycota; c__Dothideomycetes; o__Pleosporales; f__Phaeosphaeriaceae; g__Chaetosphaeronema; Unclassified	Phaeosphaeriaceae	Pathotroph-Saprotroph	Fungal Parasite-Plant Pathogen-Plant Saprotroph	Cannon PF, Kirk PM. 2007. Fungal Families of the World. CAB International, Cambridge	0	0	0	0	0	0	0	0	0	0	0	0	0	0	0	0	0	9	0	0	0	0	0	0
OTU454	k__Fungi; p__Basidiomycota; c__Exobasidiomycetes; o__Exobasidiales; f__Brachybasidiaceae; g__Meira; s__Meira_miltonrushii	Brachybasidiaceae	Pathotroph	Plant Pathogen	Cannon PF, Kirk PM. 2007. Fungal Families of the World. CAB International, Cambridge	0	0	0	0	0	0	0	0	4	0	10	0	0	0	0	0	0	0	0	0	0	1	0	0
OTU461	k__Fungi; p__Ascomycota; c__Sordariomycetes; o__Sordariales; f__Chaetomiaceae; g__Myceliophthora; s__Myceliophthora_fergusii	Chaetomiaceae	Pathotroph-Saprotroph-Symbiotroph	Animal Pathogen-Dung Saprotroph-Endophyte-Epiphyte-Plant Saprotroph-Wood Saprotroph	Seehann G, et al. 1975. List of Fungi in Soft-Rot Tissue Tests. Institute fur Holzbiologie und Holzschutz, Bundesforschungsanstalt fur Forst - und Holzwirtshaft, Hamburg - Lohbrugge, Germany; Cannon PF, Kirk PM. 2007. Fungal Families of the World. CAB International, Cambridge; Bills GF, et al. 2013. Current Opinion in microbiology, 16:549-565; Tedersoo L, et al. 2014. Science 346:1256688; Irinyi …	0	0	0	0	0	0	0	0	0	0	0	0	0	0	0	0	0	0	0	0	11	0	0	0
OTU483	k__Fungi; p__Basidiomycota; c__Agaricomycetes; o__Agaricales; f__Physalacriaceae; g__Armillaria; Unclassified	Physalacriaceae	Pathotroph-Saprotroph	Algal Parasite--Leaf Saprotroph-Wood Saprotroph	Cannon PF, Kirk PM. 2007. Fungal Families of the World. CAB International, Cambridge	0	7	0	1	0	0	0	0	0	0	0	0	0	0	0	0	0	0	0	0	0	0	0	0
OTU493	k__Fungi; p__Ascomycota; c__Sordariomycetes; o__Xylariales; f__Diatrypaceae; Unclassified; Unclassified	Diatrypaceae	Pathotroph-Saprotroph	Plant Pathogen-Plant Saprotroph	Cannon PF, Kirk PM. 2007. Fungal Families of the World. CAB International, Cambridge	0	0	0	0	0	0	0	0	0	0	2	0	0	0	0	1	0	0	0	1	0	9	0	0
OTU502	k__Fungi; p__Ascomycota; c__Sordariomycetes; o__Xylariales; f__Sporocadaceae; g__Pestalotiopsis; Unclassified	Pestalotiopsis	Pathotroph	Plant Pathogen	Tedersoo L, et al. 2014. Science 346:1256688	0	0	0	0	0	0	0	0	0	0	0	0	0	0	0	0	0	0	0	9	0	0	0	0
OTU509	k__Fungi; p__Ascomycota; c__Dothideomycetes; o__Botryosphaeriales; f__Botryosphaeriaceae; g__Botryosphaeria; Unclassified	Botryosphaeria	Pathotroph-Symbiotroph	Endophyte-Plant Pathogen	Tedersoo L, et al. 2014. Science 346:1256688; Christian N, et al. 2016. Microbial Ecology 72:621-632; http://www.apsnet.org/publications/commonnames/Pages/default.aspx	0	0	0	0	0	0	0	0	0	0	0	0	0	0	0	5	0	0	0	0	0	0	0	0
OTU51	k__Fungi; p__Ascomycota; c__Sordariomycetes; o__Sordariales; f__Chaetomiaceae; g__Arcopilus; s__Arcopilus_cupreus	Chaetomiaceae	Pathotroph-Saprotroph-Symbiotroph	Animal Pathogen-Dung Saprotroph-Endophyte-Epiphyte-Plant Saprotroph-Wood Saprotroph	Seehann G, et al. 1975. List of Fungi in Soft-Rot Tissue Tests. Institute fur Holzbiologie und Holzschutz, Bundesforschungsanstalt fur Forst - und Holzwirtshaft, Hamburg - Lohbrugge, Germany; Cannon PF, Kirk PM. 2007. Fungal Families of the World. CAB International, Cambridge; Bills GF, et al. 2013. Current Opinion in microbiology, 16:549-565; Tedersoo L, et al. 2014. Science 346:1256688; Irinyi …	0	0	6	4	76	45	3	44	17	20	18	51	20	15	9	7	0	0	3	0	0	0	12	10
OTU512	k__Fungi; p__Basidiomycota; c__Agaricomycetes; o__Atheliales; f__Atheliaceae; g__Athelia; Unclassified	Athelia	Pathotroph-Saprotroph-Symbiotroph	Epiphyte-Leaf Saprotroph-Lichen Parasite-Lichenized-Plant Pathogen-Wood Saprotroph	Adams GC, Kropp BR. 1996. Mycologia 88:459-472; Carisse O, et al. 2000. Biological Control 90:31-37; Esslinger TL. 2014. North Dakota State University (http://www.ndsu.edu/pubweb/~esslinge/chcklst/chcklst7.htm)	0	0	0	0	0	0	0	0	0	0	0	0	0	0	0	0	0	0	0	0	0	13	0	4
OTU520	k__Fungi; p__Ascomycota; c__Eurotiomycetes; o__Chaetothyriales; f__Cyphellophoraceae; g__Cyphellophora; s__Cyphellophora_fusarioides	Cyphellophora	Pathotroph-Saprotroph	Animal Pathogen-Undefined Saprotroph	Tedersoo L, et al. 2014. Science 346:1256688 (doi:10.1126/science.1256688); Irinyi L, et al. 2015. Medical Mycology 53:313-337	0	0	0	0	0	5	0	0	0	0	0	0	0	0	0	0	0	0	0	0	0	0	0	0
OTU522	k__Fungi; p__Ascomycota; c__Sordariomycetes; o__Sordariales; f__Chaetomiaceae; Unclassified; Unclassified	Chaetomiaceae	Pathotroph-Saprotroph-Symbiotroph	Animal Pathogen-Dung Saprotroph-Endophyte-Epiphyte-Plant Saprotroph-Wood Saprotroph	Seehann G, et al. 1975. List of Fungi in Soft-Rot Tissue Tests. Institute fur Holzbiologie und Holzschutz, Bundesforschungsanstalt fur Forst - und Holzwirtshaft, Hamburg - Lohbrugge, Germany; Cannon PF, Kirk PM. 2007. Fungal Families of the World. CAB International, Cambridge; Bills GF, et al. 2013. Current Opinion in microbiology, 16:549-565; Tedersoo L, et al. 2014. Science 346:1256688; Irinyi …	0	0	0	0	0	0	0	0	0	3	0	1	0	11	2	4	0	0	0	0	0	0	0	0
OTU533	k__Fungi; p__Ascomycota; c__Dothideomycetes; o__Pleosporales; f__Coniothyriaceae; g__Coniothyrium; Unclassified	Coniothyrium	Pathotroph-Saprotroph	Plant Pathogen-Wood Saprotroph	Duncan CG, Eslyn WE. 1966. Mycologia 58:642-664; Nilsson T. 1973. Studies on wood degradation and cellulolytic activity of microfungi. No. 104; Seehann G, et al. 1975. List of Fungi in Soft-Rot Tissue Tests. Institute fur Holzbiologie und Holzschutz, Bundesforschungsanstalt fur Forst - und Holzwirtshaft, Hamburg - Lohbrugge, Germany; http://www.apsnet.org/publications/commonnames/Pages/default.as…	0	0	0	0	0	0	0	0	0	0	0	0	0	0	0	0	0	0	0	0	0	0	0	8
OTU54	k__Fungi; p__Ascomycota; c__Sordariomycetes; o__Sordariales; f__Chaetomiaceae; g__Mycothermus; s__Mycothermus_thermophilus	Chaetomiaceae	Pathotroph-Saprotroph-Symbiotroph	Animal Pathogen-Dung Saprotroph-Endophyte-Epiphyte-Plant Saprotroph-Wood Saprotroph	Seehann G, et al. 1975. List of Fungi in Soft-Rot Tissue Tests. Institute fur Holzbiologie und Holzschutz, Bundesforschungsanstalt fur Forst - und Holzwirtshaft, Hamburg - Lohbrugge, Germany; Cannon PF, Kirk PM. 2007. Fungal Families of the World. CAB International, Cambridge; Bills GF, et al. 2013. Current Opinion in microbiology, 16:549-565; Tedersoo L, et al. 2014. Science 346:1256688; Irinyi …	3	18	23	0	0	20	0	0	23	4	5	12	16	7	6	23	0	38	0	20	30	197	19	81
OTU545	k__Fungi; p__Ascomycota; c__Sordariomycetes; o__Coniochaetales; f__Coniochaetaceae; g__Coniochaeta; s__Coniochaeta_mutabilis	Coniochaeta	Pathotroph-Saprotroph-Symbiotroph	Animal Pathogen-Dung Saprotroph-Endophyte-Lichen Parasite-Plant Pathogen-Undefined Saprotroph	Bell A. 1983. Dung Fungi: An Illustrated Guide to Coprophilous Fungi in New Zealand. Victoria University Press, Wellington; Damm U, et al. 2010. Persoonia 24:60-80; Costa IPMW, et al. 2012. Mycotaxon 119:26; Tedersoo L, et al. 2014. Science 346:1256688 (doi:10.1126/science.1256688); Irinyi L, et al. 2015. Medical Mycology 53:313-337; Lawrey JD, Diederich P. 2016. URL: http://www.lichenicolous.net…	0	0	0	0	0	0	0	0	0	0	0	0	0	0	0	0	0	0	0	0	0	6	0	0
OTU546	k__Fungi; p__Basidiomycota; c__Agaricomycetes; o__Cantharellales; f__Ceratobasidiaceae; g__Waitea; Unclassified	Waitea	Pathotroph	Plant Pathogen	Tedersoo L, et al. 2014. Science 346:1256688 (doi:10.1126/science.1256688)	1	0	0	0	0	0	0	0	0	0	0	0	0	0	0	0	0	0	0	0	0	8	0	0
OTU555	k__Fungi; p__Ascomycota; c__Dothideomycetes; o__Pleosporales; f__Leptosphaeriaceae; g__Leptosphaeria; s__Leptosphaeria_sclerotioides	Leptosphaeria	Pathotroph	Plant Pathogen	Tedersoo L, et al. 2014. Science 346:1256688	0	3	0	0	0	0	0	0	0	0	0	0	0	0	0	0	0	0	0	0	0	0	0	0
OTU57	k__Fungi; p__Ascomycota; c__Eurotiomycetes; o__Eurotiales; f__Aspergillaceae; g__Aspergillus; s__Aspergillus_flavus	Aspergillus flavus	Pathotroph-Saprotroph	Animal Pathogen-Plant Pathogen-Wood Saprotroph	Seehann G, et al. 1975. List of Fungi in Soft-Rot Tissue Tests. Institute fur Holzbiologie und Holzschutz, Bundesforschungsanstalt fur Forst - und Holzwirtshaft, Hamburg - Lohbrugge, Germany; Irinyi L, et al. 2015. Medical Mycology 53:313-337; http://www.apsnet.org/publications/commonnames/Pages/default.aspx; http://www.cdc.gov	1	6	9	0	0	5	8	9	21	9	12	0	12	4	0	7	0	21	0	32	13	2	22	73
OTU574	k__Fungi; p__Ascomycota; c__Leotiomycetes; o__Erysiphales; f__Erysiphaceae; g__Erysiphe; s__Erysiphe_platani	Erysiphe	Pathotroph	Plant Pathogen	Tedersoo L, et al. 2014. Science 346:1256688	0	0	0	0	0	0	0	0	0	0	0	0	0	0	0	0	0	0	0	0	0	9	0	0
OTU577	k__Fungi; p__Basidiomycota; c__Agaricomycetes; o__Corticiales; f__Corticiaceae; g__Limonomyces; Unclassified	Limonomyces	Pathotroph	Plant Pathogen	Tedersoo L, et al. 2014. Science 346:1256688	0	0	0	0	0	1	0	0	0	0	0	0	0	0	0	0	0	0	0	0	0	9	0	0
OTU58	k__Fungi; p__Ascomycota; c__Sordariomycetes; o__Microascales; f__Microascaceae; Unclassified; Unclassified	Microascaceae	Pathotroph-Saprotroph-Symbiotroph	Animal Pathogen-Endophyte-Plant Pathogen-Undefined Saprotroph	Cannon PF, Kirk PM. 2007. Fungal Families of the World. CAB International, Cambridge	30	56	35	40	37	21	12	34	19	26	26	23	14	7	22	0	23	24	25	0	11	5	0	26
OTU582	k__Fungi; p__Ascomycota; c__Eurotiomycetes; o__Chaetothyriales; f__Chaetothyriaceae; Unclassified; Unclassified	Chaetothyriaceae	Pathotroph-Symbiotroph	Epiphyte-Plant Pathogen	Cannon PF, Kirk PM. 2007. Fungal Families of the World. CAB International, Cambridge	1	0	0	5	0	0	0	0	0	0	0	0	0	0	0	0	0	0	0	0	0	0	0	3
OTU591	k__Fungi; p__Ascomycota; c__Leotiomycetes; o__Erysiphales; f__Erysiphaceae; Unclassified; Unclassified	Erysiphaceae	Pathotroph	Plant Pathogen	Cannon PF, Kirk PM. 2007. Fungal Families of the World. CAB International, Cambridge	0	0	0	0	0	0	0	0	0	0	0	0	0	0	0	0	0	0	0	0	0	6	0	0
OTU597	k__Fungi; p__Ascomycota; c__Dothideomycetes; o__Pleosporales; f__Phaeosphaeriaceae; g__Leptospora; Unclassified	Phaeosphaeriaceae	Pathotroph-Saprotroph	Fungal Parasite-Plant Pathogen-Plant Saprotroph	Cannon PF, Kirk PM. 2007. Fungal Families of the World. CAB International, Cambridge	0	0	0	0	5	0	0	0	0	0	0	0	0	0	0	0	0	0	0	0	0	0	0	0
OTU611	k__Fungi; p__Basidiomycota; c__Agaricomycetes; o__Agaricales; f__Marasmiaceae; Unclassified; Unclassified	Marasmiaceae	Pathotroph-Saprotroph-Symbiotroph	Endophyte-Plant Pathogen-Undefined Saprotroph	Cannon PF, Kirk PM. 2007. Fungal Families of the World. CAB International, Cambridge; David AS, et al. 2016. Microbial Ecology 71:912-926	0	0	0	0	0	0	0	0	0	0	0	0	0	0	0	0	0	0	4	0	0	0	0	0
OTU632	k__Fungi; p__Ascomycota; c__Dothideomycetes; o__Pleosporales; f__Pleosporaceae; Unclassified; Unclassified	Pleosporaceae	Pathotroph-Saprotroph	Endophyte-Lichen Parasite-Plant Pathogen-Undefined Saprotroph	Cannon PF, Kirk PM. 2007. Fungal Families of the World. CAB International, Cambridge; David AS, et al. 2016. Microbial Ecology 71:912-926; Lawrey JD, Diederich P. 2016. URL: http://www.lichenicolous.net [24 May 2017]	0	0	0	0	4	0	0	0	0	0	0	0	0	0	0	0	0	0	0	0	0	0	0	0
OTU690	k__Fungi; p__Ascomycota; c__Sordariomycetes; o__Sordariales; f__Chaetomiaceae; Unclassified; Unclassified	Chaetomiaceae	Pathotroph-Saprotroph-Symbiotroph	Animal Pathogen-Dung Saprotroph-Endophyte-Epiphyte-Plant Saprotroph-Wood Saprotroph	Seehann G, et al. 1975. List of Fungi in Soft-Rot Tissue Tests. Institute fur Holzbiologie und Holzschutz, Bundesforschungsanstalt fur Forst - und Holzwirtshaft, Hamburg - Lohbrugge, Germany; Cannon PF, Kirk PM. 2007. Fungal Families of the World. CAB International, Cambridge; Bills GF, et al. 2013. Current Opinion in microbiology, 16:549-565; Tedersoo L, et al. 2014. Science 346:1256688; Irinyi …	8	0	0	0	0	0	0	0	0	0	0	0	0	0	0	0	0	0	0	0	0	0	0	0
OTU7	k__Fungi; p__Ascomycota; c__Leotiomycetes; o__Thelebolales; f__Pseudeurotiaceae; g__Pseudogymnoascus; Unclassified	Pseudogymnoascus	Pathotroph-Saprotroph-Symbiotroph	Animal Pathogen-Soil Saprotroph	Minnis AM, Lindner DL. 2013. Fungal Biology 117:638-649; Tedersoo L, et al. 2014. Science 346:1256688	37	10	18	5	77	91	14	167	43	3	103	66	11	27	45	28	161	55	37	643	96	63	57	29
OTU70	k__Fungi; p__Ascomycota; c__Eurotiomycetes; o__Chaetothyriales; f__Trichomeriaceae; g__Knufia; s__Knufia_tsunedae	Knufia	Pathotroph-Saprotroph	Animal Pathogen-Plant Pathogen-Soil Saprotroph-Undefined Saprotroph	Li DM, et al. 2008. Studies in Mycology 61:131-136; Crous PW, et al. 2013. Persoonia 31:188-296; Irinyi L, et al. 2015. Medical Mycology 53:313-337	0	0	7	8	46	5	0	0	0	0	14	0	0	0	6	0	39	0	8	0	9	0	1	0
OTU706	k__Fungi; p__Ascomycota; c__Dothideomycetes; o__Pleosporales; f__Phaeosphaeriaceae; g__Paraphoma; Unclassified	Phaeosphaeriaceae	Pathotroph-Saprotroph	Fungal Parasite-Plant Pathogen-Plant Saprotroph	Cannon PF, Kirk PM. 2007. Fungal Families of the World. CAB International, Cambridge	0	0	0	0	0	0	0	0	0	0	0	0	0	0	0	0	0	0	0	0	0	3	0	0
OTU713	k__Fungi; p__Ascomycota; c__Sordariomycetes; o__Sordariales; f__Lasiosphaeriaceae; g__Cladorrhinum; s__Cladorrhinum_bulbillosum	Cladorrhinum	Pathotroph-Saprotroph-Symbiotroph	Animal Pathogen-Dung Saprotroph-Endophyte-Plant Saprotroph-Soil Saprotroph-Wood Saprotroph	Seehann G, et al. 1975. List of Fungi in Soft-Rot Tissue Tests. Institute fur Holzbiologie und Holzschutz, Bundesforschungsanstalt fur Forst - und Holzwirtshaft, Hamburg - Lohbrugge, Germany; Carmaran CC, et al.2015. Mycological Progress 14:94; Irinyi L, et al. 2015. Medical Mycology 53:313-337	0	0	0	0	0	0	0	0	0	0	0	0	0	0	0	0	0	0	0	10	6	0	2	0
OTU718	k__Fungi; p__Ascomycota; c__Dothideomycetes; o__Pleosporales; f__Leptosphaeriaceae; g__Leptosphaeria; s__Leptosphaeria_sclerotioides	Leptosphaeria	Pathotroph	Plant Pathogen	Tedersoo L, et al. 2014. Science 346:1256688	0	0	0	3	0	0	0	0	0	0	0	0	0	0	0	0	0	0	0	0	0	0	0	0
OTU734	k__Fungi; p__Basidiomycota; c__Agaricomycetes; o__Cantharellales; f__Ceratobasidiaceae; g__Ceratobasidium; Unclassified	Ceratobasidiaceae	Pathotroph-Saprotroph-Symbiotroph	Endomycorrhizal-Plant Pathogen-Undefined Saprotroph	Cannon PF, Kirk PM. 2007. Fungal Families of the World. CAB International, Cambridge	1	1	0	0	0	0	0	0	0	0	0	0	0	5	0	0	0	0	0	0	0	0	0	0
OTU754	k__Fungi; p__Ascomycota; c__Dothideomycetes; o__Pleosporales; f__Pleosporaceae; g__Curvularia; Unclassified	Curvularia	Pathotroph	Plant Pathogen	Tedersoo L, et al. 2014. Science 346:1256688	0	0	0	0	0	0	0	0	0	0	0	0	0	0	2	0	0	0	0	0	0	0	9	4
OTU76	k__Fungi; p__Ascomycota; c__Sordariomycetes; o__Microascales; f__Microascaceae; g__Microascus; s__Microascus_brevicaulis	Microascaceae	Pathotroph-Saprotroph-Symbiotroph	Animal Pathogen-Endophyte-Plant Pathogen-Undefined Saprotroph	Cannon PF, Kirk PM. 2007. Fungal Families of the World. CAB International, Cambridge	48	15	100	30	0	0	2	0	0	0	0	1	0	0	0	0	0	0	0	15	15	0	1	13
OTU79	k__Fungi; p__Ascomycota; c__Eurotiomycetes; o__Chaetothyriales; f__Chaetothyriaceae; Unclassified; Unclassified	Chaetothyriaceae	Pathotroph-Symbiotroph	Epiphyte-Plant Pathogen	Cannon PF, Kirk PM. 2007. Fungal Families of the World. CAB International, Cambridge	31	14	16	30	11	5	2	0	0	0	0	0	0	0	2	7	0	0	0	0	0	0	0	4
OTU81	k__Fungi; p__Ascomycota; c__Dothideomycetes; o__Botryosphaeriales; f__Botryosphaeriaceae; g__Macrophoma; s__Macrophoma_sophoricola	Macrophoma	Pathotroph	Plant Pathogen	Tedersoo L, et al. 2014. Science 346:1256688	0	0	0	0	0	0	0	0	0	0	0	0	0	3	0	99	0	0	0	0	0	0	0	0
OTU89	k__Fungi; p__Ascomycota; c__Dothideomycetes; o__Venturiales; f__Venturiaceae; g__Venturia; Unclassified	Venturia	Pathotroph	Plant Pathogen	Tedersoo L, et al. 2014. Science 346:1256688 (doi:10.1126/science.1256688)	0	23	0	0	9	22	0	11	0	0	8	0	0	0	0	0	0	13	0	0	0	0	0	0
OTU9	k__Fungi; p__Ascomycota; c__Dothideomycetes; o__Pleosporales; f__Pleosporaceae; g__Curvularia; s__Curvularia_trifolii	Curvularia	Pathotroph	Plant Pathogen	Tedersoo L, et al. 2014. Science 346:1256688	31	118	79	134	67	406	14	39	8	0	0	7	0	13	14	27	0	6	0	0	0	2	0	0
